# Supplementary material
Source: PubMed Central journal article supplement (PMC2040923)

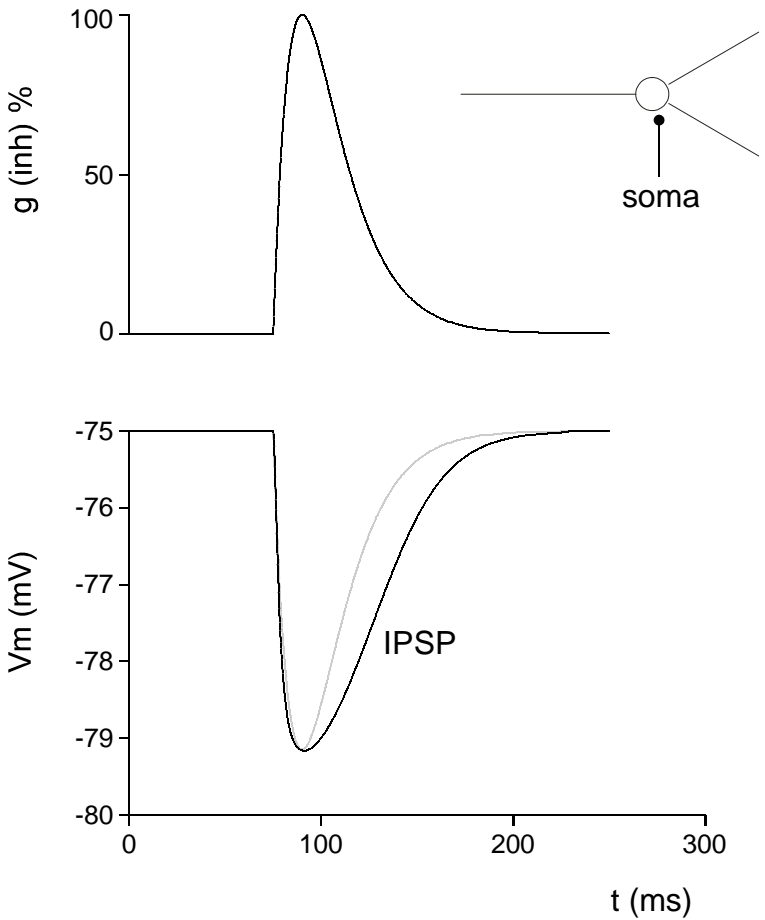

Supplement: pnas_0704832104_1.pdf [file pnas_0704832104_1.pdf]

**A**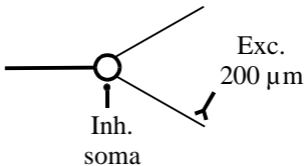**B**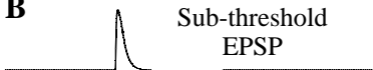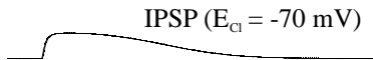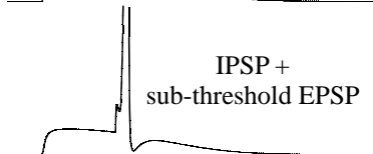

20 mV

50 ms

Supplement: pnas_0704832104_2.pdf [file pnas_0704832104_2.pdf]

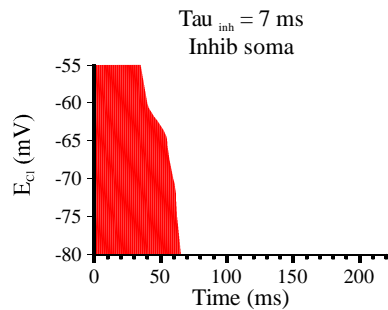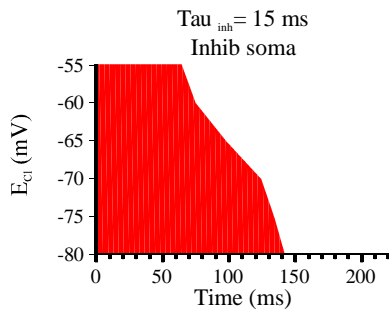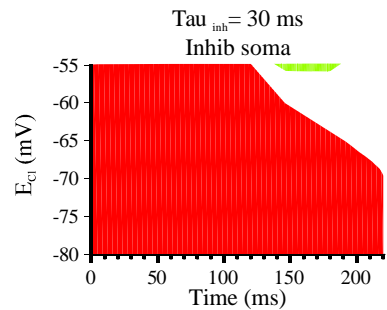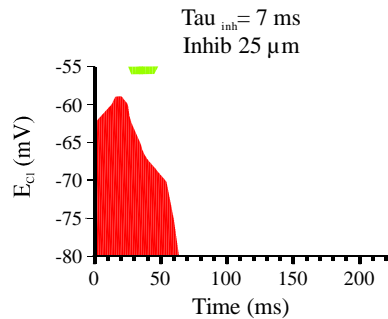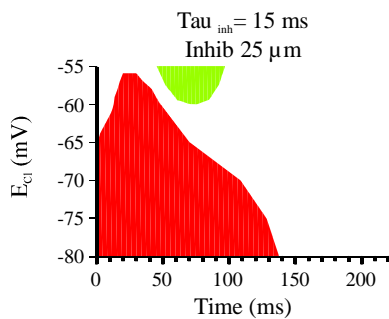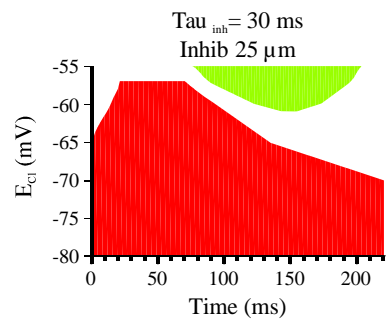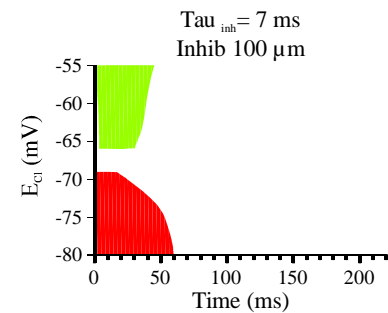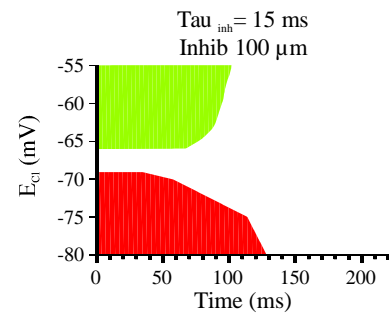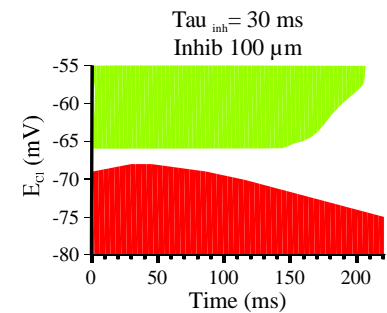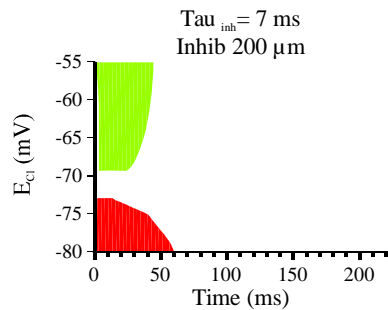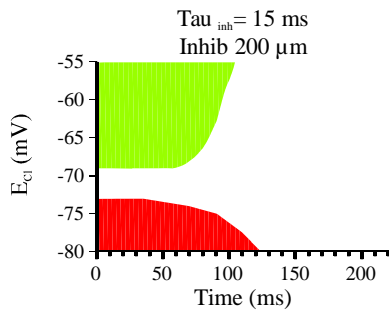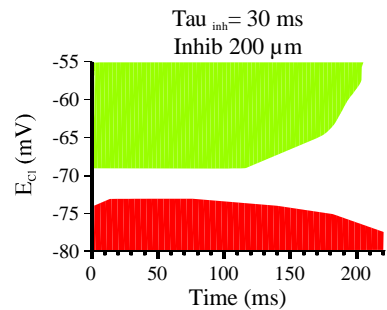

Supplement: pnas_0704832104_3.pdf [file pnas_0704832104_3.pdf]
